# Supplementary material for: Selenoprotein R Protects Human Lens Epithelial Cells against d-Galactose-Induced Apoptosis by Regulating Oxidative Stress and Endoplasmic Reticulum Stress
Source: MDPI journal article supplement (doi:10.3390/ijms17020231), 2016-02-10
Supplement: s1 [file s1]

# Supplementary Materials: Selenoprotein R Protects Human Lens Epithelial Cells against D-Galactose-Induced Apoptosis by Regulating Oxidative Stress and Endoplasmic Reticulum Stress

Jie Dai, Hongmei Liu, Jun Zhou and Kaixun Huang \*

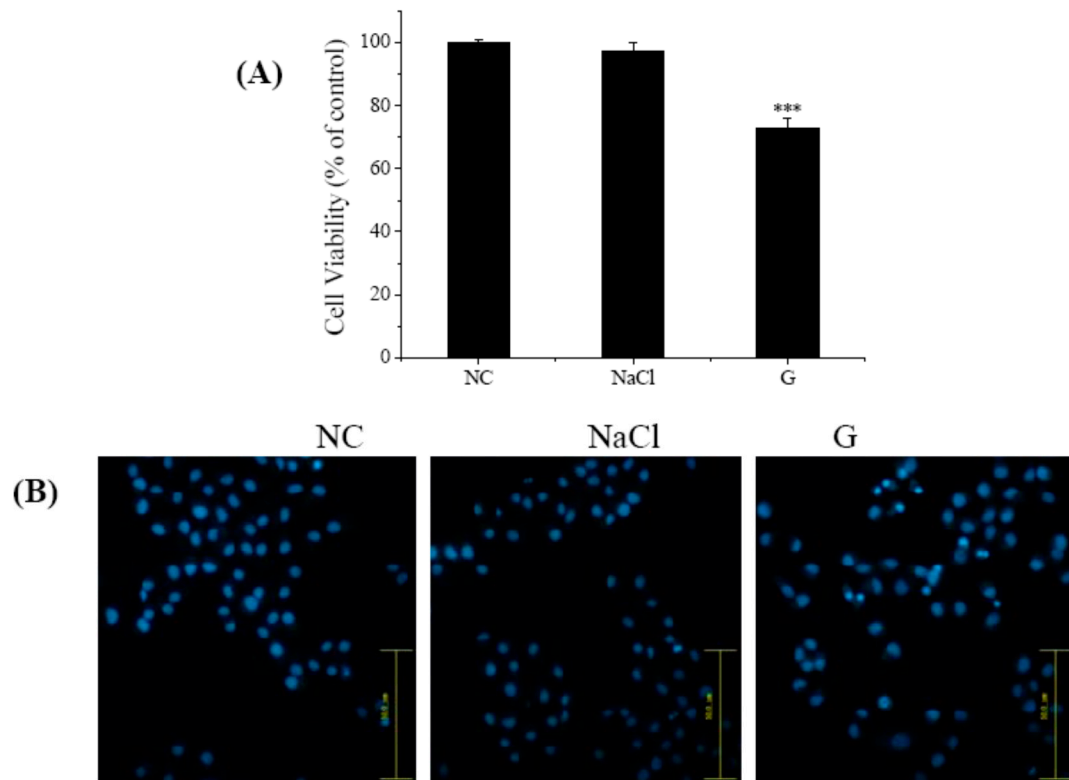

**Figure S1.** Cell viability investigated using the MTT assay and cell apoptosis observed from cell morphological alterations under the fluorescence microscopy after staining with Hoechst 33258. Data are the mean  $\pm$  SD of at least three independent experiments. \*\*\*  $p < 0.001$ , compared to the normal control group. NC: normal control cells; NaCl: cells exposed to 75 mM NaCl for 36 h; G: cells exposed to D-galactose (150 mM) for 36 h.
